# Supplementary material for: calix-Tris-Tröger's bases – a new cavitand family
Source: Royal Society of Chemistry journal article supplement (doi:10.1039/b706791g), 2007-01-01

## Calix-Tris-Tröger's Bases – A New Cavitand Family

*Martin Valík, Jan Čejka, Martin Havlík, Vladimír Král, Bohumil Dolenský\**

Department of Analytical Chemistry and Department of Solid State Chemistry, Institute of Chemical Technology Prague,

Technická 5, Praha 6, 166 28, Czech Republic. *dolenskb@vscht.cz*

### C o n t e x t

- S2 ... Preparation of nitroamide **2c**
- S2 ... Preparation of aminoamide **3c**
- S3 ... Preparation of hexaamine **4c**
- S3 ... Preparation of *throne-1c*
- S4 ... Preparation of *calix-1c* by diastereiosomeration
- S4 ... One-pot preparation of *throne-1b*
- S5 ... Preparation of *calix-1b* by diastereiosomeration
- S6 ... Approximation of cavity volume calculation

## EXPERIMENTAL PART

All  $^1\text{H}$  and  $^{13}\text{C}$  NMR experiments were recorded at 300.08 and 75.46 MHz, respectively. Chemical shifts  $\delta$  (ppm) are referenced to the internal standard  $\text{Me}_4\text{Si}$  for both  $^1\text{H}$  and  $^{13}\text{C}$  NMR spectra; the coupling constants  $J$  are given in Hertz (Hz). The correlation techniques g-HSQC, g-COSY, 1D NOESY (mixing time 600 ms) were recorded under common conditions. The g-HMBC spectra were recorded with parameters of  $^1J_{\text{CH}}$  coupling 180 Hz (parameter j1hx at Varian Mercury NMR machine) and  $^nJ_{\text{CH}}$  coupling 8 Hz (parameter jnhx at Varian Mercury NMR machine). The chemical shifts and coupling constants for  $\text{H}^{7\text{a}}$ ,  $\text{H}^{7\text{b}}$ ,  $\text{H}^{8\text{a}}$ ,  $\text{H}^{8\text{b}}$ ,  $\text{H}^{9\text{a}}$  and  $\text{H}^{9\text{b}}$  in *calix-1b* and *calix-1c* were determined by simulation as six-spins system by MestRe-C 4.4.6 (Mestrelab Research, Spain). Crystallographic data have been deposited with the Cambridge Crystallographic Data Centre as supplementary publication nos. CCDC-640697 (*calix-1c*) and CCDC-640698 (*throne-1c*). Copies of the data can be obtained free of charge on application to CCDC, 12 Union Road, Cambridge CB2 1EZ, UK (fax: (+44)1223-336-033; e-mail: deposit@ccdc.cam.ac.uk). The preparations of compounds **2b**, **3b**, **4b**, *throne-1b*, **2a**, **3a** and **4a**, and unsuccessful attempt of *throne-1a* preparation were described previously.<sup>[6a]</sup>

### Preparation of nitroamide **2c**

5-methoxy-2-nitrobenzoic acid (12.9 g, 65.5 mmol) was refluxed with  $\text{SOCl}_2$  (40 mL) in toluene (50 mL) for 5 h. The volatile part of reaction mixture was evaporated and residue codistilled with toluene (2×20 mL). Residual brown oil was added to solution of 1,3,5-triaminobenzene (2.02 g, 16.4 mmol) in pyridine (20 mL) and DMF (40 mL). Reaction mixture was stirred 12 h at room temperature and 1 h at 50 °C. After cooling, 1 L of water was added. The formed precipitate of **2c** (6.10 g, 63% yield) was filtered off, washed with methanol (100 mL) and dichloromethane (150 mL). Additional part of **2c** (0.75 g, 8% yield) was obtained from the organic part of the filtrate.  $^1\text{H}$  NMR ( $\text{DMSO-}d_6$ ): 3.92 (9H, s,  $\text{OCH}_3$ ), 7.20 (6H, m), 7.87 (3H, s), 8.15 (3H, d, 8.5), 10.69 (3H, s, NH).  $^{13}\text{C}$  APT NMR ( $\text{DMSO-}d_6$ ): 56.57 ( $\text{OCH}_3$ ), 106.69 (CH), 114.22 (CH), 115.33 (CH), 126.92 (CH), 135.67, 138.68, 139.41, 163.51, 164.16. Elemental analysis for  $\text{C}_{30}\text{H}_{24}\text{N}_6\text{O}_{12}$  calcd: 54.55 %C, 3.66 %H, 12.72 %N; found: 54.22 %C, 3.93 %H, 12.82 %N.

### Preparation of aminoamide **3c**

A flask was charged with 1.00 g (1.5 mmol) of **2c**, 100 mg of Pd/C (10%), 50 mL of methanol, and 10 mL of DMF. The mixture was stirred over night under  $\text{H}_2$  atmosphere. The catalyst was filtrated off through cellite and the filtrate was concentrated *in vacuo* to obtained 0.86 g of **3c** (100% yield).  $^1\text{H}$  NMR ( $\text{DMSO-}d_6$ ): 3.72 (9H, s), 5.80-6.20 (6H, br s), 6.72 (3H, d, 8.8), 6.89 (3H, dd, 8.8, 2.8), 7.20 (3H, d, 2.8), 7.81 (3H, s), 10.08 (3H, br s).  $^{13}\text{C}$  APT NMR ( $\text{DMSO-}d_6$ ): 55.61

(OCH<sub>3</sub>), 109.70 (CH), 112.67 (CH), 115.83, 117.96 (CH), 119.92 (CH), 139.03, 143.58, 149.52, 167.50. HRMS (FAB<sup>+</sup>) for C<sub>30</sub>H<sub>31</sub>N<sub>6</sub>O<sub>6</sub> (MH<sup>+</sup>) calcd: 571.2305; found: 571.2298, and for C<sub>30</sub>H<sub>30</sub>N<sub>6</sub>O<sub>6</sub> (M<sup>+</sup>) calcd: 570.2227; found: 570.2214.

#### Preparation of hexaamine **4c**

3.5 M toluene solution of LAH (18 mL, 63 mmol) was slowly added to **3c** (1.30 g, 2.3 mmol) in dioxane (40 mL). Then the reaction mixture was refluxed for 14 h. The flask was placed into ice bath and 6 mL of water, followed by 7 mL of aqueous solution of NaOH (15%) and 10 mL of water were cautiously added. The mixture was filtered and the filtrate was evaporated *in vacuo* to obtain 1.12 g of **4c** (93% yield). <sup>1</sup>H NMR (DMSO-*d*<sub>6</sub>): 3.57 (9H, s), 3.91 (6H, d, 5.5), 4.45 (6H, br s), 5.30 (6H, m), 6.54 (6H, m), 6.69 (3H, t, 1.6). <sup>13</sup>C APT NMR (DMSO-*d*<sub>6</sub>): 44.12 (CH<sub>2</sub>), 55.23 (OCH<sub>3</sub>), 87.64 (CH), 112.22 (CH), 114.38 (CH), 115.51 (CH), 125.32, 139.80, 150.20, 150.89. LRMS (FAB<sup>+</sup>): for C<sub>30</sub>H<sub>37</sub>N<sub>6</sub>O<sub>3</sub> (MH<sup>+</sup>) calcd: 529.29; found: 529.29.

#### Preparation of *throne-1c*

Hexaamine **4c** (1.21 g, 2.3 mmol) and 1.00 g of paraformaldehyde were added to trifluoroacetic acid (145 mL). The reaction mixture was stirred 1 h at 50 °C, then diluted with ice water (1 L), and conc. aq. ammonia was added to pH 14. The mixture was extracted with CH<sub>2</sub>Cl<sub>2</sub> (3×150 mL). The organic parts were combined, washed with brine, dried over Na<sub>2</sub>SO<sub>4</sub>, and evaporated *in vacuo* to dryness. By repeating column chromatography on silica (CH<sub>2</sub>Cl<sub>2</sub>/EtOAc/ethanol 250:250:12) 80 mg of by-product **5** (6% yield) 320 mg of crude Tris-TB *throne-1c* were obtained. The crystallization of crude *throne-1c* from CH<sub>2</sub>Cl<sub>2</sub>/acetone gave 240 mg (18% yield) of pure *throne-1c*.

*By-product 5*: <sup>1</sup>H NMR (CDCl<sub>3</sub>): 2.80 (3H, s, NCH<sub>3</sub>), 3.71 (3H, s, OCH<sub>3</sub>), 3.73 (3H, s, OCH<sub>3</sub>), 3.75 (3H, s, OCH<sub>3</sub>), 3.91 (1H, d, 16.7), 3.95 (1H, d, 10.8), 4.01 (1H, d, 15.8), 4.02 (1H, d, 13.3), 4.04 (1H, d, 10.6), 4.13 (1H, d, 12.7), 4.18 (1H, d, 15.6), 4.19 (1H, d, 12.2), 4.28 (3H, m), 4.46 (1H, d, 16.9), 4.47 (1H, d, 17.1), 4.52 (1H, d, 17.9), 4.56 (1H, d, 17.2), 4.59 (1H, d, 16.6), 6.41 (1H, d, 2.9), 6.46 (1H, d, 2.8), 6.50 (1H, t, 1.7), 6.67 (1H, s), 6.78 (4H, m), 7.07 (1H, d, 8.8), 7.11 (1H, d, 8.8). <sup>13</sup>C APT NMR (CDCl<sub>3</sub>): 38.93 (NCH<sub>3</sub>), 53.60 (CH<sub>2</sub>), 55.25 (CH<sub>2</sub>), 55.29 (OCH<sub>3</sub>), 55.35 (OCH<sub>3</sub>), 55.55 (CH<sub>2</sub>), 55.64 (OCH<sub>3</sub>), 55.84 (CH<sub>2</sub>), 59.08 (CH<sub>2</sub>), 66.76 (CH<sub>2</sub>), 67.00 (CH<sub>2</sub>), 71.05 (CH<sub>2</sub>), 110.54 (CH), 110.68 (CH), 111.73 (CH), 113.17 (CH), 113.20 (CH), 113.82 (CH), 113.97 (CH), 115.76 (CH), 117.98, 118.77, 123.75, 126.20 (CH), 126.27 (CH), 128.60, 128.75, 140.33, 140.77, 140.92, 145.82, 147.53, 148.00, 152.54, 155.86, 155.96. HRMS (FAB<sup>+</sup>): for C<sub>36</sub>H<sub>39</sub>N<sub>6</sub>O<sub>3</sub> (MH<sup>+</sup>) calcd: 603.3084; found: 603.3056. Based on these characteristics and 2D NMR spectra (g-COSY, g-HSQC, g-HMBC) the following structure was deduced.

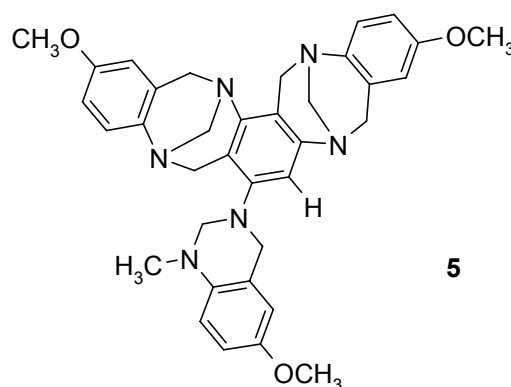

**Throne-1c:**  $^1\text{H}$  NMR ( $\text{CDCl}_3$ ): 3.60 (1H, d, 16.8), 3.65 (3H, s), 3.72 (3H, s), 3.73 (3H, s), 3.82 (1H, d, 16.5), 3.88 (1H, d, 16.7), 4.08 (1H, d, 12.8), 4.10 (1H, d, 12.2), 4.16 (1H, d, ~13), 4.18 (1H, d, ~13), 4.19 (2H, s), 4.29 (1H, d, 17.4), 4.36 (1H, d, 17.0), 4.41-4.52 (5H, m), 4.53 (1H, d, 17.4), 4.56 (1H, d, 17.0), 6.25 (1H, d, 2.9), 6.41 (1H, d, 2.9), 6.45 (1H, d, 2.9), 6.69 (1H, dd, 8.8, 2.9), 6.76 (1H, dd, 8.8, 2.9), 6.78 (3H, dd, 8.8, 2.9), 7.08 (1H, d, 8.8), 7.12 (1H, d, 8.8), 7.15 (3H, d, 8.8).  $^{13}\text{C}$  APT NMR ( $\text{CDCl}_3$ ): 54.67 ( $2\times\text{CH}_2$ ), 55.08 ( $2\times\text{CH}_2$ ), 55.31 ( $\text{OCH}_3$ ), 55.36 ( $\text{OCH}_3$ ), 55.38 ( $\text{OCH}_3$ ), 55.57 ( $\text{CH}_2$ ), 56.19 ( $\text{CH}_2$ ), 66.69 ( $\text{CH}_2$ ), 66.74 ( $\text{CH}_2$ ), 66.97 ( $\text{CH}_2$ ), 110.53 (CH), 110.66 ( $2\times\text{CH}$ ), 113.80 (CH), 114.08 (CH), 114.46 (CH), 117.94, 118.25, 119.02, 125.84 (CH), 126.28 (CH), 126.38 (CH), 128.38, 128.50, 128.54, 140.82, 140.94, 141.17, 143.94, 144.26 ( $2\times\text{C}$ ), 155.92, 155.99, 156.09. HRMS ( $\text{FAB}^+$ ): for  $\text{C}_{36}\text{H}_{37}\text{N}_6\text{O}_3$  ( $\text{MH}^+$ ) calcd: 601.2927; found: 601.2939.

#### Preparation of *calix-1c* by diastereoisomeration

**Throne-1c** (54 mg) was dissolved in 5 mL of TFA and warmed at 110 °C for 15 h. The obtained mixture of *throne-1c* and *calix-1c* in ratio 97:3 was separated by preparative TLC (Uniplate Silica Gel GF, 20 cm  $\times$  20 cm  $\times$  0.1 cm, with PA zone,  $\text{CH}_2\text{Cl}_2/\text{CH}_3\text{OH}$  97:3). The diastereoisomer *throne-1c* was subject of next diastereoisomerization. The collected portions of *calix-1c* from five isomerizations gave 6 mg (11% yield). The single crystal for X-ray analysis was obtained by crystallization from mixture  $\text{CH}_2\text{Cl}_2/\text{CH}_3\text{OH}$ . The  $^1\text{H}$  and  $^{13}\text{C}$  chemical shifts in NMR spectra were assigned based on g-COSY, g-HSQC, g-HMBC and 1D NOEDIF spectra analogously to assignment on bisTB derivatives.<sup>[6c]</sup>

**Calix-1c:**  $^1\text{H}$  NMR ( $\text{CDCl}_3$ ): 3.64 (9H, s, H12), 3.65 (3H, d, 16.8, H7<sup>a</sup>), 4.18 (3H, d, 17.7, H9<sup>a</sup>), 4.18 (3H, d, 12.3, H8<sup>a</sup> or H8<sup>b</sup>), 4.20 (3H, d, 12.3, H8<sup>a</sup> or H8<sup>b</sup>), 4.48 (3H, d, 16.8, H7<sup>b</sup>), 4.66 (3H, d, 17.7, H9<sup>b</sup>), 6.28 (3H, d, 2.9, H6), 6.71 (3H, dd, 8.8, 2.9, H2), 7.11 (3H, d, 8.8, H3).  $^{13}\text{C}$  NMR ( $\text{CDCl}_3$ ): 54.91 C7, 55.35 C12, 56.09 C9, 66.39 C8, 110.67 C6, 114.49 C2, 120.40 C10, 125.98 C3, 128.23 C5, 141.26 C4, 144.31 C11, 156.16 C1. HRMS ( $\text{FAB}^+$ ): for  $\text{C}_{36}\text{H}_{37}\text{N}_6\text{O}_3$  ( $\text{MH}^+$ ) calcd: 601.2927; found: 601.2908.

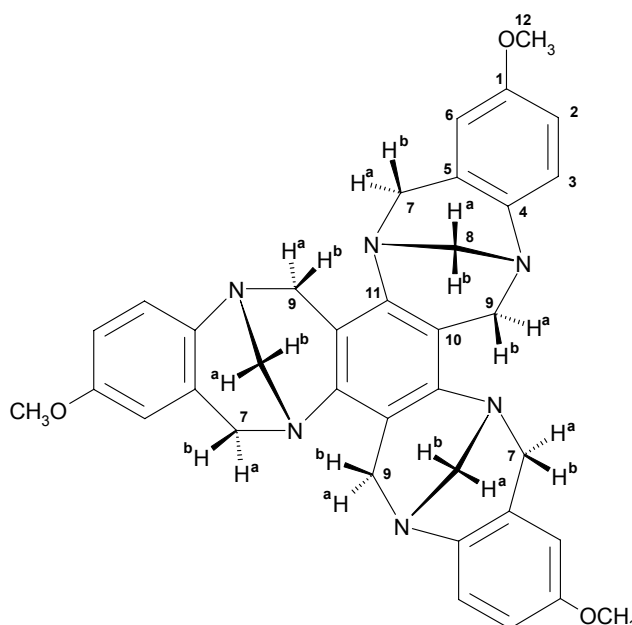

### One-pot preparation of *throne-1b*

A vial was charged with 86 mg (0.70 mmol) of 1,3,5-triaminobenzene, 249 mg (2.32 mmol) of *p*-toluidine and 199 mg (equiv. of 6.63 mmol of CH<sub>2</sub>O) of paraformaldehyde, and 4 mL of TFA was added. The vial was closed with a cap, and the mixture was vigorously stirred for 24 h in 60 °C oil bath. The mixture was cool down and diluted with 200 mL of water, and alkalinized by adding of 5 mL of conc. aqueous ammonium. The mixture was extracted with CH<sub>2</sub>Cl<sub>2</sub> (2 x 20 mL). The organic parts were dried over MgSO<sub>4</sub> and evaporated *in vacuo* to dryness. Repeating separation on preparative TLC (CH<sub>2</sub>Cl<sub>2</sub>/CH<sub>3</sub>OH 100:3) gave 8 mg (2% yield) of *throne-1b*. The NMR characteristics confirm the identity with the compound isolated previously.<sup>[6c]</sup>

*Throne-1b*: <sup>1</sup>H NMR (CDCl<sub>3</sub>): 2.18 (3H, s, CH<sub>3</sub>), 2.24 (6H, m, 2CH<sub>3</sub>), 3.60 (1H, d, 16.5), 3.73 (1H, d, 16.8), 3.86 (1H, d, 16.5), 4.00-4.65 (15H, m), 6.54 (1H, s), 6.70 (1H, s), 6.74 (1H, s), 6.86-7.14 (6H, m). <sup>13</sup>C APT NMR (CDCl<sub>3</sub>): 20.88 (CH<sub>3</sub>), 21.90 (CH<sub>3</sub>), 20.96 (CH<sub>3</sub>), 54.39 (CH<sub>2</sub>), 54.42 (CH<sub>2</sub>), 55.11 (CH<sub>2</sub>), 55.17 (CH<sub>2</sub>), 55.24 (CH<sub>2</sub>), 56.25 (CH<sub>2</sub>), 66.59 (2CH<sub>2</sub>), 66.85 (CH<sub>2</sub>), 117.70 (C), 118.13 (C), 118.82 (C), 124.42 (CH), 124.99 (CH), 125.07 (CH), 126.87 (CH), 126.92 (CH), 127.19 (C), 127.35 (2C), 127.38 (CH), 127.90 (CH), 127.98 (CH), 128.04 (CH), 133.36 (C), 133.38 (C), 133.48 (C), 143.74 (C), 144.03 (C), 144.07 (C), 144.99 (C), 145.09 (C), 145.34 (C). HRMS (FAB<sup>+</sup>): for C<sub>36</sub>H<sub>37</sub>N<sub>6</sub> (MH<sup>+</sup>) calcd: 553.3080; found: 553.3056.

### Preparation of *calix-1b* by diastereoisomeration

*Throne-1b* (17 mg) was dissolved in 2 mL of TFA and warmed at 110 °C for 17 h. The obtained mixture of *throne-1b* and *calix-1b* in ratio 97:3 was separated by preparative TLC (Uniplate Silica Gel GF, 20 cm × 20 cm × 0.1 cm, with PA zone, CH<sub>2</sub>Cl<sub>2</sub>/CH<sub>3</sub>OH 92:2) to give about 1 mg of *calix-1b*. The <sup>1</sup>H and <sup>13</sup>C chemical shifts in NMR spectra were assigned based on gCOSY, gHSQC, gHMBC and 1D NOEDIF spectra analogously to assignment on bisTB derivatives.<sup>[6c]</sup>

*Calix-1b*: <sup>1</sup>H NMR (CDCl<sub>3</sub>): 2.16 (9H, s, H12), 3.59 (3H, d, 16.8, H7<sup>a</sup>), 4.16 (3H, d, 12.4, H8<sup>a</sup> or H8<sup>b</sup>), 4.20 (3H, d, 12.4, H8<sup>a</sup> or H8<sup>b</sup>), 4.21 (3H, d, 16.6, H9<sup>a</sup>), 4.45 (3H, d, 16.7, H7<sup>b</sup>), 4.65 (3H, d, 17.6, H9<sup>b</sup>), 6.56 (3H, d, 1.4, H6), 6.94 (3H, dd, 8.1, 1.9, H2), 7.06 (3H, d, 8.1, H3). <sup>13</sup>C NMR (CDCl<sub>3</sub>): 20.76 C12, 54.63 C7, 56.12 C9, 66.29 C8, 120.32 C10, 124.71 C3, 127.20 C5, 127.42 C6, 128.06 C2, 133.55 C1, 144.25 C11, 145.77 C4.

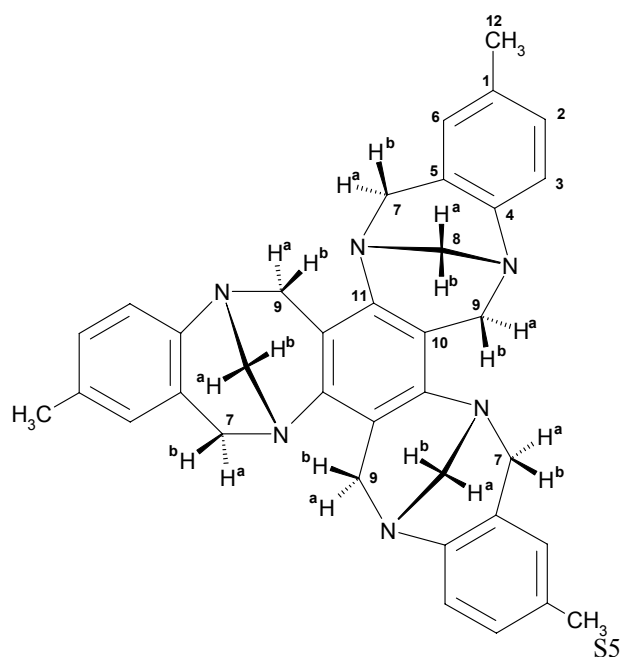

### Approximation of cavity volume calculation

The volume of the *calix-1c* was calculated from X-ray data as the volume of truncated cone with following definition. The nitrogen atoms of central benzene define almost equilateral triangle with side 0.49 nm and the circumscribed circle  $d_1 = 0.65$  nm. The oxygen atoms define almost equilateral triangle with side 0.85 nm and the circumscribed circle  $d_2 = 0.98$  nm. The distance of the triangle centroids is  $h = 0.55$  nm. The dimensions must be decreased by van der Waals diameter; let's use a correction by 0.16 nm. The volume of the free space for guest is  $0.078$  nm<sup>3</sup>.

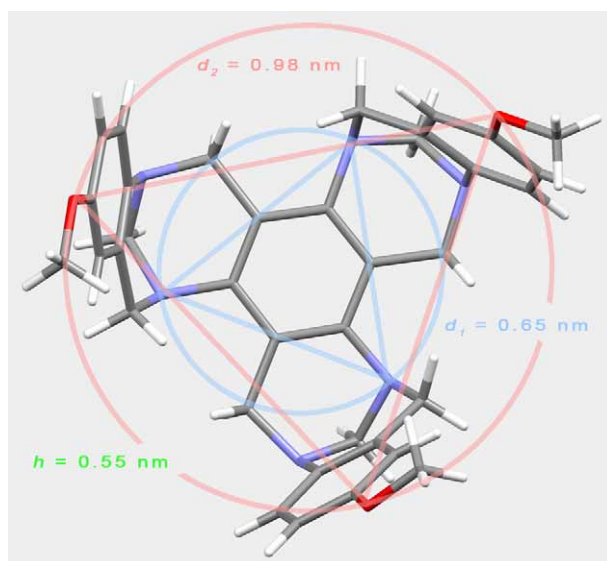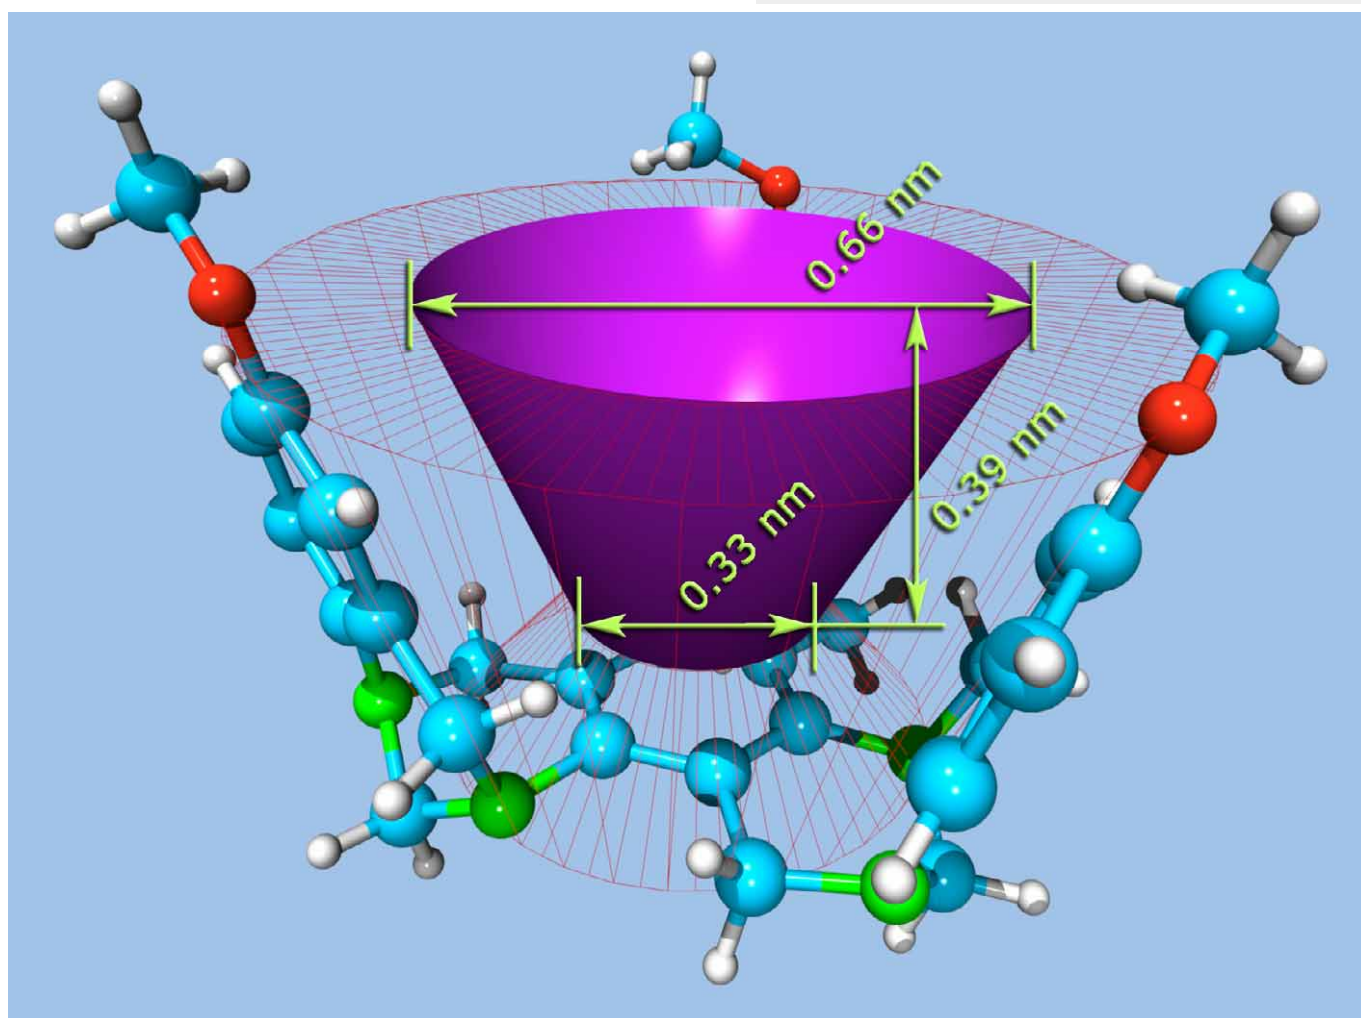

Supplement: b706791g.pdf [file b706791g.pdf]
